# Supplementary material for: Electronic and optical properties of the triphenylamine-based organic dye sensitized TiO2 semiconductor: insight from first principles calculations
Source: Royal Society of Chemistry journal article supplement (doi:10.1039/c3cp51019k), 2013-01-01
Supplement: c3cp51019k.pdf [file c3cp51019k.pdf]

## Supporting Information

# Electronic and Optical Properties of the Triphenylamine-Based Organic Dye Sensitized TiO<sub>2</sub> Semiconductor: Insight from First Principles Calculations

Jinxia Liang<sup>1</sup>, Chun Zhu<sup>1,2</sup> and Zexing Cao<sup>1\*</sup>

<sup>1</sup>State Key Laboratory of Physical Chemistry of Solid Surfaces and Fujian Provincial Key Laboratory of Theoretical and Computational Chemistry, College of Chemistry and Chemical Engineering, Xiamen University, Xiamen 360015, China

<sup>2</sup>School of Chemistry and Chemical Engineering, Guizhou University, Guizhou 550025, China

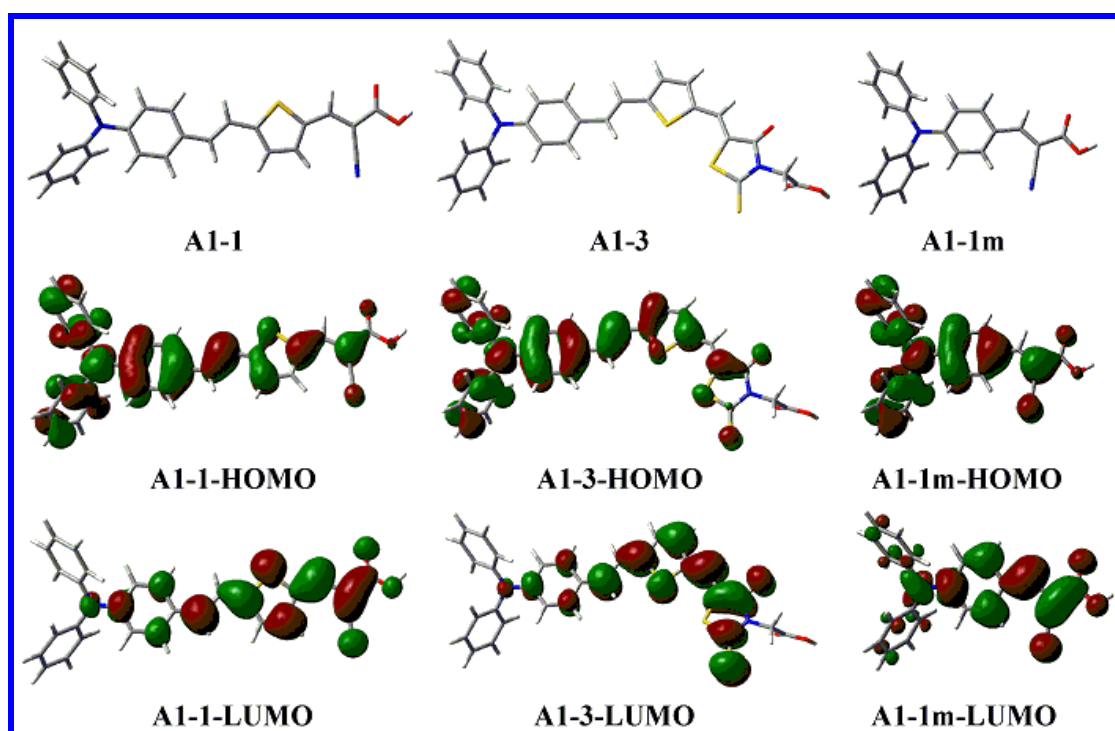

**Figure S1.** The selected molecular orbitals of A1-1, A1-3 and the simplified molecule A1-1m structures.

A reasonable simplified approximation in A1-3 structure has been made, as Figure

S1 shows, obviously, almost no changes in the electronic density on the triphenylamine group and the cyanoacrylic acid group of HOMO and LUMO for A1-3 and the simplified A1-1m. Following, by using this simplified dye A1-1m, we investigate the different adsorption modes on the surface of TiO<sub>2</sub> and the most stable adsorption configuration has been presented on the Figure S2.

The adsorption energy for these configurations can be estimated by:

$$E_{\text{adsorption}} = E_{\text{total}} - E_{\text{A1-1}} - E_{\text{TiO}_2}$$

where  $E_{\text{adsorption}}$  is the adsorption energy of dye,  $E_{\text{total}}$  is total energy of the dye+TiO<sub>2</sub> system,  $E_{\text{A1-1}}$  is the total energy of isolated dye and  $E_{\text{TiO}_2}$  is the total energy of the slab structure of TiO<sub>2</sub> without adsorbing dye.

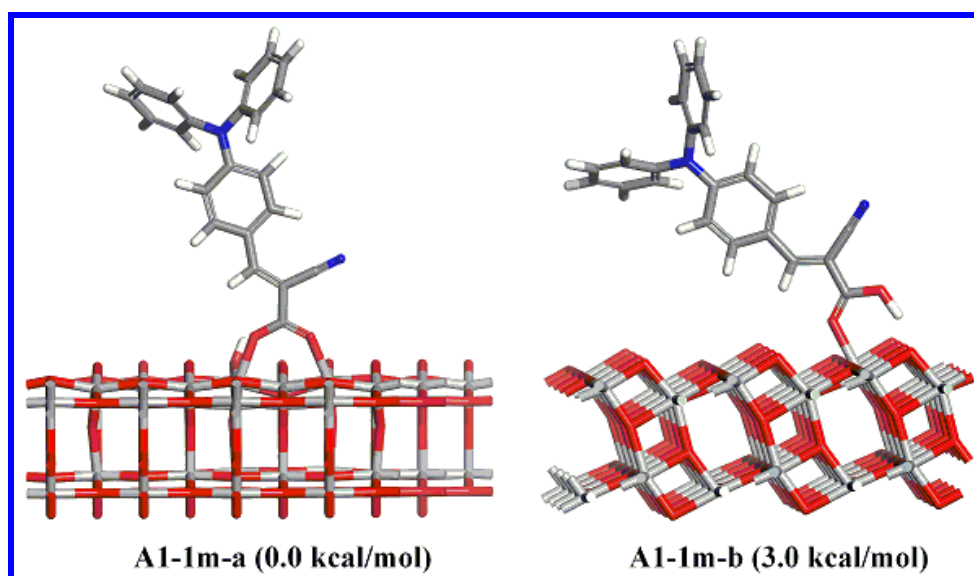

**Figure S2** The different adsorption modes on the surface of TiO<sub>2</sub> for A1-1m-a and A1-1m-b structures.

The different band structures calculated by the pure density functional GGA-PBE and the hybrid functional HSE06 are displayed in Figure S3. As Figure S3 shows, the energy band gaps are 2.62 eV and 3.84 eV, corresponding to the results calculated by GGA-PBE and HSE06, respectively. The error caused by pure GGA-PBE is about 1.2 eV.

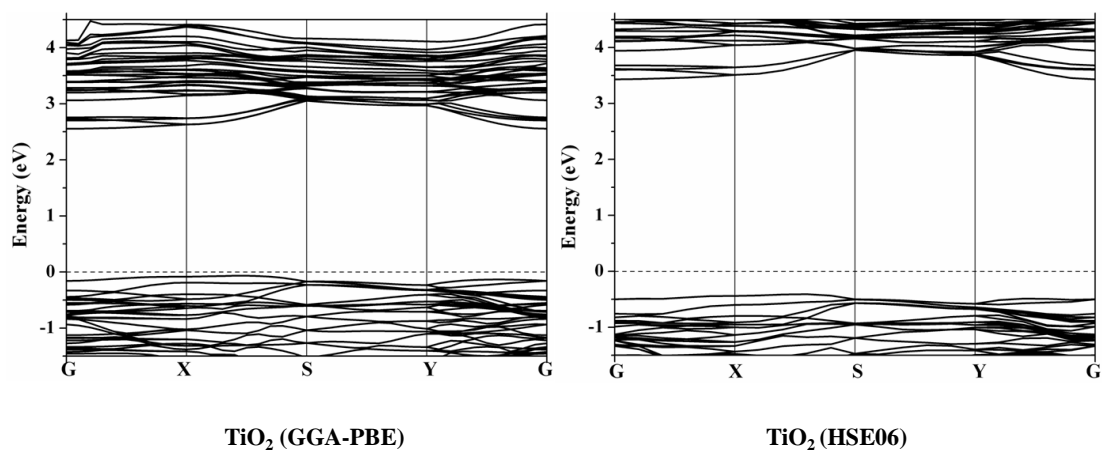

**Figure S3.** Comparison of the band structures calculated by GGA-PBE and HSE06 for bare TiO<sub>2</sub> slab structure.

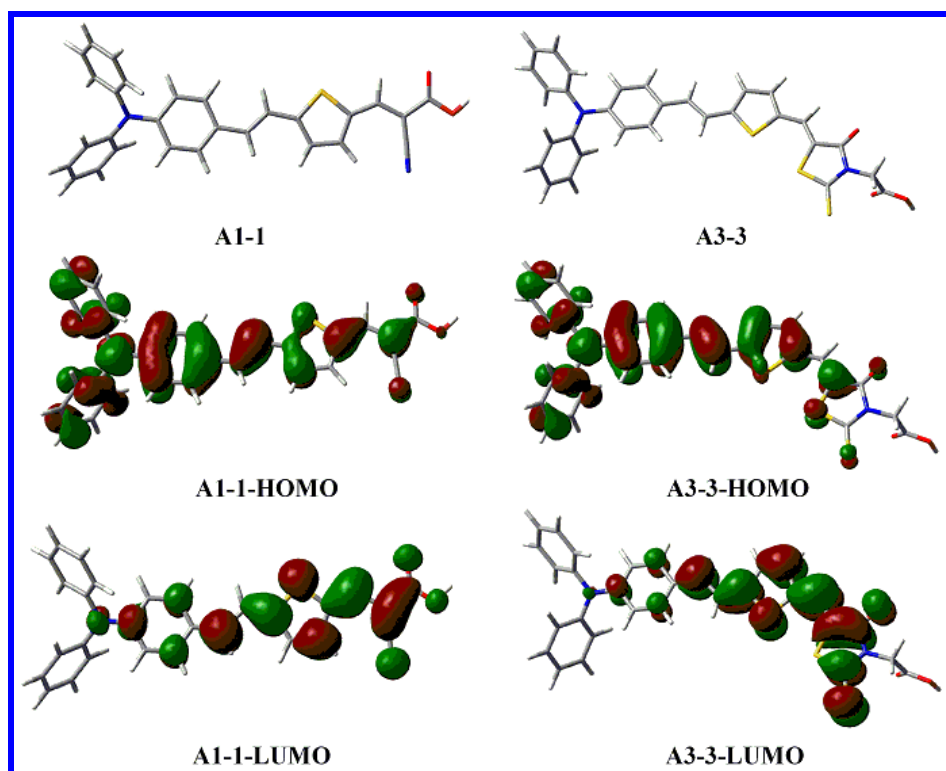

**Figure S4.** The selected molecular orbitals of A1-1 and A3-3 structures in MeCN.

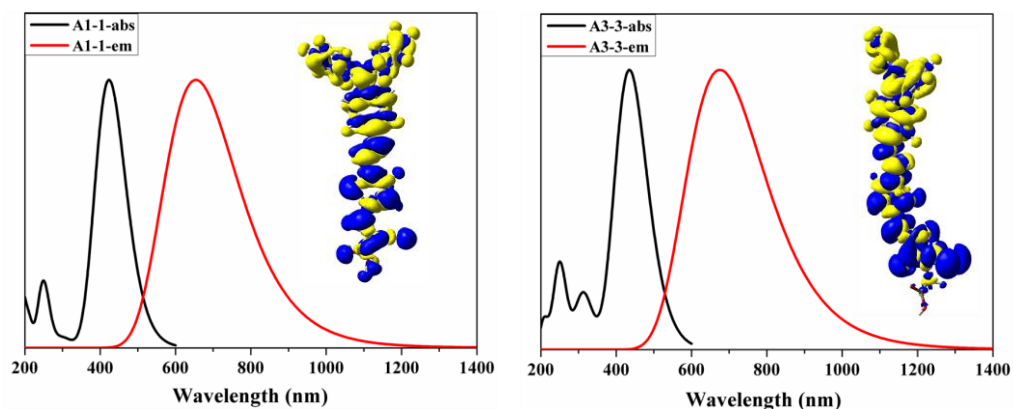

**Figure S5.** Normalized absorption (black) and emission spectra (TD-DFT/6-31G(d), red) for A1-1 and A3-3 (in MeCN), along with the computed difference in electronic density between the first excited state and the ground state (blue and yellow refer to an increase and a decrease of electronic density, respectively; isovalue 0.0004 au).

**Table S1.** The HOMO-LUMO Energy gap ( $E_g$ ), transition energy ( $\lambda$ ), excited state and a few comparative peaks, oscillator strength ( $f$ ) of A1-1 and A3-1 structures and solvent.

| Molecular | $-E_{\text{HOMO}}$ | $-E_{\text{LUMO}}$ | $E_g$ | $\lambda/\text{nm}(eV)$ | Excited state         | $f$    |
|-----------|--------------------|--------------------|-------|-------------------------|-----------------------|--------|
| A1-1      | 5.07               | 2.77               | 2.30  | 423(2.93)               | 117 (HOMO)→118 (LUMO) | 1.9710 |
| A3-3      | 5.01               | 2.83               | 2.18  | 435(2.85)               | 144 (HOMO)→145 (LUMO) | 2.0121 |

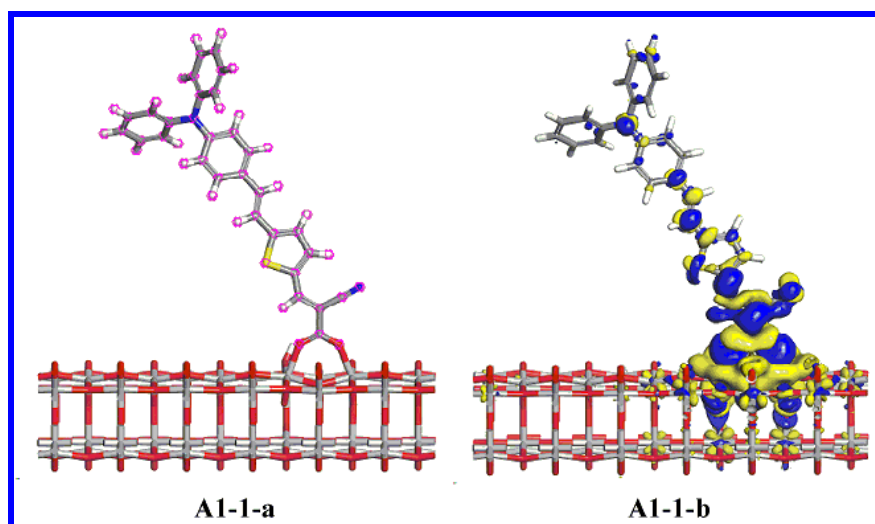

**Figure S6.** Optimized structure of A1-1-a (A1-1+TiO<sub>2</sub>) and the computed difference in electronic density A1-1-b between the different two fragments (blue and yellow refer to an increase and a decrease of electronic density, respectively; isovalue 0.004 au), where the first fragment is the molecule adsorbed on the surface of TiO<sub>2</sub> (pink circle) and the second fragment is TiO<sub>2</sub> (101).

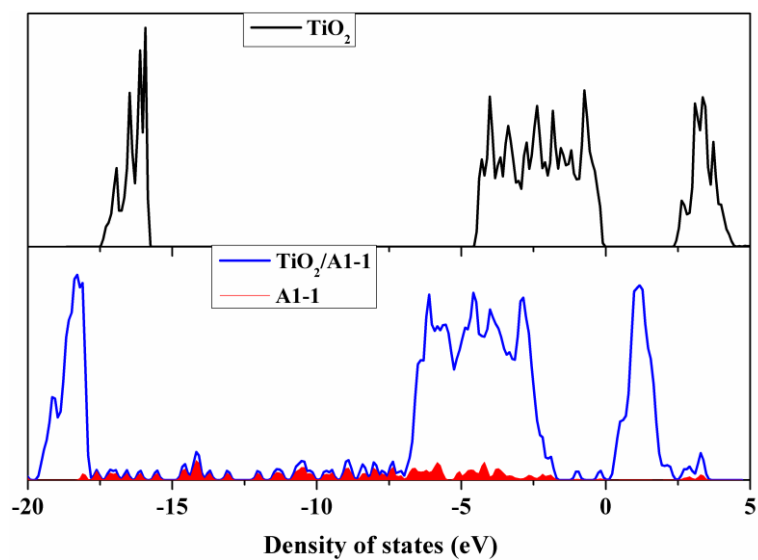

**Figure S7.** The calculated density of states (DOS) of isolated  $\text{TiO}_2$  (101) (the black line), the structure A1-1+ $\text{TiO}_2$  (the blue line) and the A1-1 dye (the red area) on the surface of the  $\text{TiO}_2$  (101).

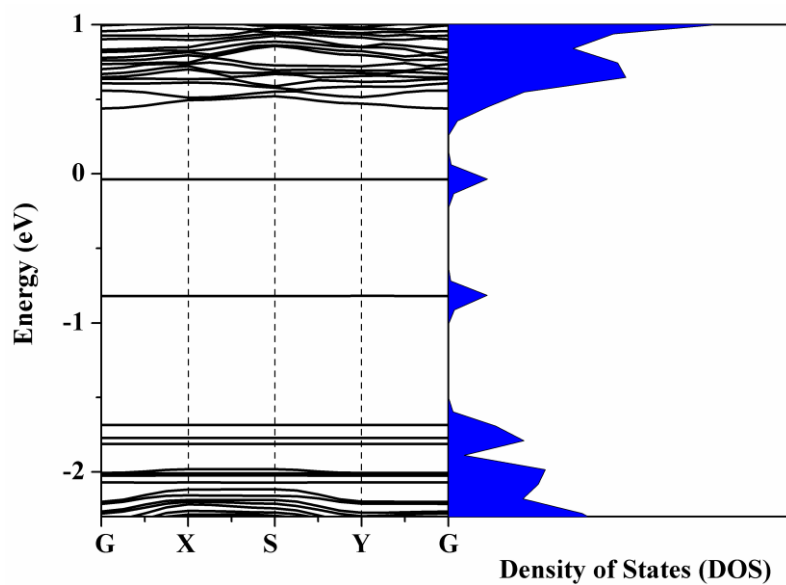

**Figure S8.** The band structures and the density of states (DOS) of A1-1+ $\text{TiO}_2$  structure.

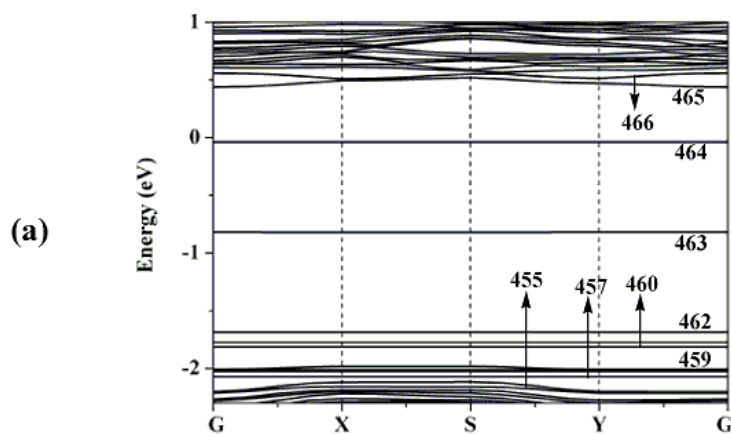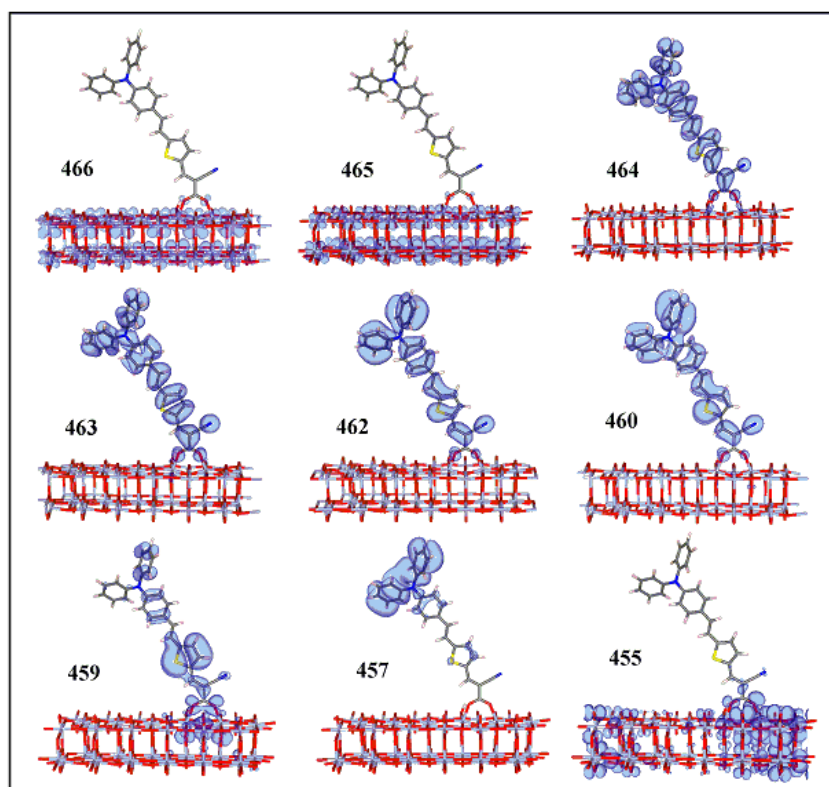

**Figure S9.** The band structure (a) of A1-1+TiO<sub>2</sub>. The partial charge densities (isovalue 0.0004 au) for the Gamma point of the 455, 457 and 459-466 bands corresponding to the identified band structures, respectively.

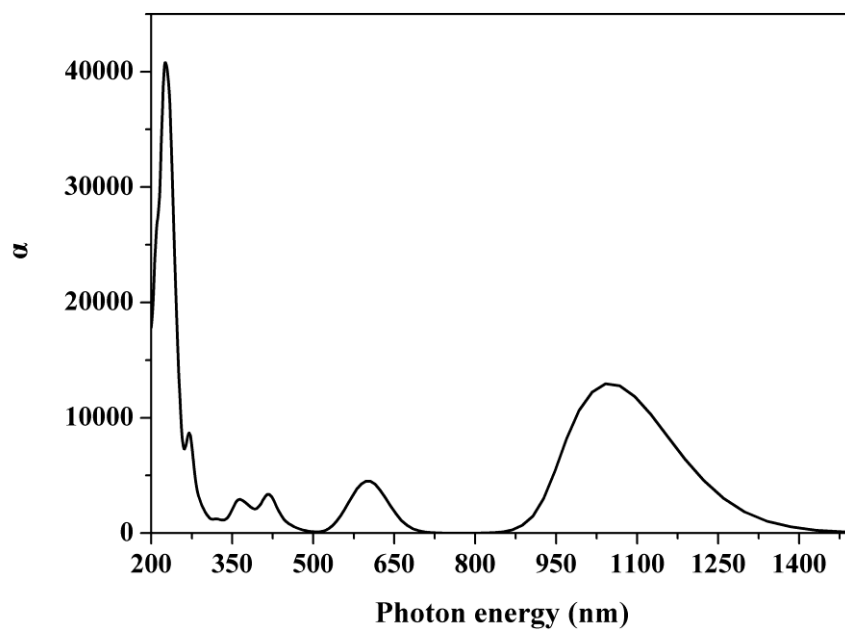

**Figure S10.** The predicted optical properties of the system (A1-1 molecule adsorped on the surface of  $\text{TiO}_2$ ), the absorption coefficient  $\alpha(\omega)$  as a function of the photon energy.
